# Supplementary material for: Preparation of porous aromatic framework/ionic liquid hybrid composite coated solid-phase microextraction fibers and their application in the determination of organochlorine pesticides combined with GC-ECD detection
Source: Royal Society of Chemistry journal article supplement (doi:10.1039/c5an01372k), 2015-11-06
Supplement: c5an01372k1.pdf [file c5an01372k1.pdf]

Electronic Supplementary Material (ESI) for Analyst.  
This journal is © The Royal Society of Chemistry 2015

**Preparation of porous aromatic framework/ionic liquid hybrid composites coated  
solid-phase microextraction fiber and application to the determination of  
organochlorine pesticides combined with gas chromatography-electron capture  
detection**

**SUPPORTING INFORMATION**

*Mingxue Wu<sup>a</sup>, Gang Chen<sup>a</sup>, Ping Liu<sup>b</sup>, Weihong Zhou<sup>a,\*</sup>, Qiong Jia<sup>a,\*</sup>*

<sup>a</sup>College of Chemistry, Jilin University, Qianjin Street 2699#, Changchun, 130012 P. R.  
China.

<sup>b</sup> Changchun GeneScience Pharmaceuticals Co., Ltd., Changchun 130012, China

\*E-mail: jiaqiong@jlu.edu.cn

**Table S1** *t* values between experimental parameter.

| Experimental parameter      | Parameter values | $\alpha$ -HCH | $\beta$ -HCH | $\delta$ -HCH | Heptachlor | Aldrin | <i>p,p'</i> -DDE | Dieldrin | <i>o,p'</i> -DDT |
|-----------------------------|------------------|---------------|--------------|---------------|------------|--------|------------------|----------|------------------|
| Extraction temperature (°C) | 30               |               |              |               |            |        |                  |          |                  |
|                             | 40               | 17.70         | 24.32        | 87.95         | 13.52      | 100.01 | 29.85            | 37.09    | 32.13            |
|                             | 50               | 138.29        | 623.84       | 420.78        | 724.15     | 472.82 | 100.19           | 90.13    | 28.08            |
|                             | 60               | 7.72          | 18.37        | 56.93         | 100.30     | 103.32 | 0.17             | 0.36     | 15.78            |
|                             | 70               | 8.77          | 17.22        | 44.94         | 28.36      | 28.54  | 5.93             | 15.47    | 35.35            |
| Extraction time (min)       | 10               | 45.11         | 97.85        | 62.49         | 254.01     | 491.15 | 760.84           | 277.92   | 449.96           |
|                             | 20               | 12.17         | 20.92        | 17.20         | 251.00     | 457.91 | 535.12           | 89.16    | 10.22            |
|                             | 30               | 58.14         | 64.77        | 12.60         | 17.58      | 54.08  | 425.48           | 281.46   | 107.77           |
|                             | 40               |               |              |               |            |        |                  |          |                  |
| Amount of NaCl (%)          | 0                | 80.48         | 61.60        | 127.34        | 297.41     | 249.97 | 71.21            | 56.74    | 91.16            |
|                             | 10               | 104.29        | 141.98       | 241.20        | 162.73     | 265.53 | 1.78             | 233.36   | 301.44           |
|                             | 20               | 95.44         | 132.04       | 291.15        | 153.09     | 273.15 | 1.97             | 227.95   | 289.34           |
|                             | 30               | 22.01         | 46.96        | 145.57        | 83.90      | 101.50 | 32.95            | 65.63    | 38.30            |
|                             | 40               |               |              |               |            |        |                  |          |                  |
| Desorption time (min)       | 1                | 499.71        | 312.98       | 41.29         | 534.78     | 317.05 | 400.91           | 421.50   | 228.09           |
|                             | 2                | 562.49        | 315.04       | 34.57         | 478.37     | 17.76  | 199.18           | 273.83   | 176.98           |
|                             | 3                | 4.60          | 17.93        | 15.01         | 33.98      | 4.33   | 170.78           | 190.13   | 160.01           |
|                             | 4                |               |              |               |            |        |                  |          |                  |

 $T_{0.05, 4} = 2.78$ .
